# Supplementary material for: Superior protein thermophilicity prediction with protein language model embeddings
Source: PubMed Central journal article supplement (PMC10566323; doi:10.1093/nargab/lqad087), 2023-10-11
Supplement: lqad087_supplemental_file.pdf [file lqad087_supplemental_file.pdf]

# Superior Protein Thermophilicity Prediction With Protein Language Model Embeddings

## Supplementary Materials

Florian Haselbeck<sup>1,2</sup>, Maura John<sup>1,2</sup>, Yuqi Zhang<sup>1</sup>, Jonathan Pirnay<sup>1,2</sup>, Juan Pablo Fuenzalida-Werner<sup>3</sup>, Rubén D. Costa<sup>3</sup> and Dominik G. Grimm<sup>1,2,4,\*</sup>

<sup>1</sup>Technical University of Munich, Campus Straubing for Biotechnology and Sustainability, Bioinformatics, 94315 Straubing, Germany, <sup>2</sup>Weihenstephan-Triesdorf University of Applied Sciences, Bioinformatics, 94315 Straubing, Germany, <sup>3</sup>Technical University of Munich, Campus Straubing for Biotechnology and Sustainability, Chair of Biogenic Functional Materials, 94315 Straubing, Germany, <sup>4</sup>Technical University of Munich, TUM School of Computation, Information and Technology (CIT), 85748 Garching, Germany

\*Corresponding author: dominik.grimm@hswt.de

Received YYYY-MM-DD; Revised YYYY-MM-DD; Accepted YYYY-MM-DD

## SUPPLEMENTARY METHODS

### Basic Descriptors

The *weight* descriptor is defined as the difference of the sum of the molecular weight of each amino acid in the protein sequence and the molecular weight of a water molecule for each peptide bound in grams per mol. The *charge* descriptor consists of three features: the net charge, the number of amino acids with positively charged side chains and the number of amino acids carrying negatively charged side chains. Here the amino acids H, K and R are specified to carry positive charges; D and E to carry negative charges; and the remaining 15 are defined as uncharged. For *polarity* we used the number of amino acids with polar side chains and the number of amino acids with non-polar side chains as features, where A, F, G, I, L, M, P, V and W were considered to be non-polar and the remaining 11 residues to be polar. Additionally, we considered the number of *aromatic* amino acids (F, W, Y) in a peptide. For the *mean hydrophobicity* of a peptide we used the hydrophobicity scale PRAM900101 (1). The *mean vdW volume* is defined to be the sum of the normalized van der Waals volume of the residues averaged over the number of amino acids in the peptide.

### Amino Acid Composition

The *amino acid composition* (AAC) describes the frequencies of each of the 20 residues in a protein sequence. Thus, for a protein sequence  $\rho$  and an amino acid  $a \in \{A, C, D, E, F, G, H, I, K, L, M, N, P, Q, R, S, T, V, W, Y\}$  the AAC feature is given as

$$\text{AAC}(\rho, a) = \frac{l(a)}{l_\rho} \in \mathbb{R} \quad (1)$$

where  $l_\rho$  is the length of the sequence  $\rho$  and  $l(a)$  denotes the number of residues of type  $a$  in  $\rho$ .

### Dipeptide Composition

The *dipeptide composition* (DPC) measures the frequencies of each of the 400 possible contiguous dipeptides in a protein sequence. Hence, for a protein sequence  $\rho$  and two amino acids  $a, b \in \{A, C, D, E, F, G, H, I, K, L, M, N, P, Q, R, S, T, V, W, Y\}$  the DPC feature is defined as

$$\text{DPC}(\rho, (a, b)) = \frac{l(a, b)}{l_\rho - 1} \in \mathbb{R} \quad (2)$$

where  $l_\rho$  denotes again the length of  $\rho$  and  $l(a, b)$  is the number of contiguous dipeptides of type  $(a, b)$  in  $\rho$ .

### Physicochemical Composition

These features describe the distribution patterns of specific physicochemical and structural properties along the protein sequence. We considered seven of those properties: hydrophobicity, where we use the scale PRAM900101 (1), normalized van der Waals

volume, polarity, polarizability, charge, secondary structure and solvent accessibility. For each of these properties, the 20 amino acids are distributed among three categories based on (2, 3). The different groups are listed in Table S1.

**Table S1.** Distribution of amino acids among different physicochemical properties: The first column gives the seven different physicochemical attributes. In the remaining three columns the amino acids are given in parenthesis, sorted into different groups based on their properties.

| Attribute             | Categories           |                            |                          |
|-----------------------|----------------------|----------------------------|--------------------------|
| Hydrophobicity        | Polar (RKEDQN)       | Neutral (GASTPHY)          | Hydrophobicity (CLVIMFW) |
| Normalized vdW Volume | 0 - 2.78 (GASCTPD)   | 2.95 - 4.0 (NVEQIL)        | 4.43 - 8.08 (MHKFRYW)    |
| Polarity              | 4.9 - 6.2 (LIFWCMVY) | 8.0 - 9.2 (PATGS)          | 10.4 - 13.0 (HQRKNED)    |
| Polarizability        | 0 - 0.108 (GASDT)    | 0.128 - 0.186 (CPNVEQIL)   | 0.219 - 0.409 (KMHFRYW)  |
| Charge                | Positive (KR)        | Neutral (ANCQGHILMFPSTWYV) | Negative (DE)            |
| Secondary Structure   | Helix (EALMQKRH)     | Strand (VIYCWFT)           | Coil (GNPSD)             |
| Solvent Accessibility | Buried (ALFCGIVW)    | Exposed (PKQEND)           | Intermediate (MPSTHY)    |

*Composition* The *composition* (CTDC) descriptor measures for each property and each category in Table S1 the corresponding fraction of residues in the sequence, leading to 21 features in total. Hence, for a protein sequence  $\rho$ , a physicochemical property  $q$  and a corresponding group  $r$  the CTDC feature is defined as

$$\text{CTDC}(\rho, q, r) = \frac{l(r|q)}{l_\rho} \in \mathbb{R} \quad (3)$$

where  $l(r|q)$  denotes the number of residues of group  $r$  and property  $q$  in the sequence.

*Transition* The *transition* (CTDT) descriptor measures for each property in Table S1 the fraction of dipeptides in the sequence where the two contiguous amino acids belong to two different groups, e.g. where a residue of group 1 is followed by a residue of group 2 or the other way round. This leads to 21 features in total. For a protein sequence  $\rho$ , a physicochemical property  $q$  and two corresponding groups  $r$  and  $s$  the CTDT feature is defined as

$$\text{CTDT}(\rho, q, \{r, s\}) = \frac{l(\{r, s\}|q)}{l_\rho - 1} \in \mathbb{R} \quad (4)$$

where  $l(\{r, s\}|q)$  is the number of dipeptides  $(a, b)$  in  $\rho$ , where either  $a$  belongs in group  $r$  and  $b$  belongs in group  $s$  or  $a$  belongs in group  $s$  and  $b$  belongs in group  $r$ .

*Distribution* The *distribution* (CTDD) descriptor consists of five values for each property and each category in Table S1, leading to 105 features in total. These values are given by the fractions of the entire sequence where the first amino acid of the corresponding group is located and where 25 %, 50 %, 75 % and 100 % of residues within a group are contained. For a protein sequence  $\rho$ , a physicochemical property  $q$ , a corresponding group  $r$  and a characteristic  $c$  (corresponding to the first amino acid or to 25 %, 50 %, 75 % or 100 % of residues) the CTDD feature is defined as

$$\text{CTDD}(\rho, q, r, c) = \frac{i_{(r|q)}^c}{l_\rho} \in \mathbb{R} \quad (5)$$

with  $i_{(r|q)}^c$  denoting the position in the protein sequence where the portion of residues of property  $q$  and group  $r$  corresponding to  $c$  occurred.

### Pseudo Amino Acid Composition

The *pseudo amino acid composition* (PAAC) includes information on the amino acid composition as well as additional discrete values that reflect the sequence order effect (4). Given a protein sequence  $\rho$  of length  $l_\rho$ , let  $a_i$  denote the  $i^{\text{th}}$  amino acid in  $\rho$  for  $i \in \{1, \dots, l_\rho\}$ . Furthermore, denote by  $\vartheta_1(a_i)$ ,  $\vartheta_2(a_i)$  and  $\vartheta_3(a_i)$  the hydrophobicity value, hydrophilicity value and side-chain mass of  $a_i$  after a standard conversion as described in (4), respectively. Define the correlation function as

$$\Psi(a_i, a_{i'}) = \frac{1}{3} \left( (\vartheta_1(a_{i'}) - \vartheta_1(a_i))^2 + (\vartheta_2(a_{i'}) - \vartheta_2(a_i))^2 + (\vartheta_3(a_{i'}) - \vartheta_3(a_i))^2 \right) \quad (6)$$

Then for  $\lambda \in \mathbb{N}$  with  $\lambda < l_p$ , the sequence order effect can be approximated via the following correlation factors:

$$\tau_1 = \frac{1}{l_p - 1} \sum_{i=1}^{l_p - 1} \Psi(a_i, a_{i+1}) \quad (7)$$

$$\tau_2 = \frac{1}{l_p - 2} \sum_{i=1}^{l_p - 2} \Psi(a_i, a_{i+2}) \quad (8)$$

$$\vdots \quad (9)$$

$$\tau_\lambda = \frac{1}{l_p - \lambda} \sum_{i=1}^{l_p - \lambda} \Psi(a_i, a_{i+\lambda}) \quad (10)$$

$$(11)$$

where  $\tau_k$  is called the  $k^{\text{th}}$ -tier correlation factor for  $k \in \{1, \dots, \lambda\}$ . Now, without loss of generality, denote the 20 amino acids by their index  $j \in \{1, \dots, 20\}$ , when sorted alphabetically according to their single-letter codes. Then the PAAC features are defined as

$$\text{PAAC}(\rho) = (\rho_u)_{u \in \{1, \dots, 20+\lambda\}} \in \mathbb{R}^{20+\lambda} \quad (12)$$

with

$$\rho_u = \begin{cases} \frac{f_u}{\sum_{j=1}^{20} f_j + \omega \sum_{k=1}^{\lambda} \tau_k}, & \text{if } 1 \leq u \leq 20 \\ \frac{\omega \tau_{u-20}}{\sum_{j=1}^{20} f_j + \omega \sum_{k=1}^{\lambda} \tau_k}, & \text{if } 20+1 \leq u \leq 20+\lambda \end{cases} \quad (13)$$

where  $f_j$  for  $j \in \{1, \dots, 20\}$ , denotes the normalized occurrence frequency of amino acid  $j$  in the peptide  $\rho$  and  $\omega$  is a weight factor. In our study we used  $\omega = 0.05$  and  $\lambda = 3$ .

## SUPPLEMENTARY TABLES

**Table S2.** List of thermophilic species and number of proteins in our full dataset before filtering for sequence length and CD-HIT. Species marked with an asterisk were used for our independent test set.

| Species                                           | Number of proteins | Species                                           | Number of proteins |
|---------------------------------------------------|--------------------|---------------------------------------------------|--------------------|
| <i>Acetivibrio thermocellus</i>                   | 33                 | <i>Pyrococcus woesei</i>                          | 1                  |
| <i>Acidianus ambivalens</i> *                     | 12                 | <i>Rhodothermus marinus</i> *                     | 9                  |
| <i>Aciduliprofundum boonei</i> *                  | 1                  | <i>Rubrobacter xylanophilus</i>                   | 2                  |
| <i>Aeropyrum pernix</i>                           | 50                 | <i>Saccharolobus solfataricus</i>                 | 195                |
| <i>Alicyclobacillus acidocaldarius</i>            | 5                  | <i>Spirochaeta thermophila</i> *                  | 2                  |
| <i>Aquifex aeolicus</i>                           | 111                | <i>Staphylothermus marinus</i>                    | 2                  |
| <i>Aquifex pyrophilus</i> *                       | 3                  | <i>Sulfolobus acidocaldarius</i>                  | 87                 |
| <i>Archaeoglobus fulgidus</i>                     | 154                | <i>Sulfolobus islandicus</i>                      | 6                  |
| <i>Archaeoglobus profundus</i> *                  | 8                  | <i>Sulfophobococcus zilligii</i> *                | 1                  |
| <i>Caldalkalibacillus thermarum</i> *             | 1                  | <i>Sulfurisphaera tokodaii</i>                    | 52                 |
| <i>Caldanaerobacter subterraneus</i>              | 6                  | <i>Symbiobacterium thermophilum</i>               | 3                  |
| <i>Caldicellulosiruptor saccharolyticus</i> *     | 2                  | <i>Thermoanaerobacter ethanolicus</i> *           | 1                  |
| <i>Carboxydothemus hydrogenoformans</i>           | 4                  | <i>Thermoanaerobacter italicus</i> *              | 1                  |
| <i>Deferribacter desulfuricans</i> *              | 1                  | <i>Thermoanaerobacter kivui</i>                   | 1                  |
| <i>Dictyoglomus thermophilum</i>                  | 3                  | <i>Thermoanaerobacterium saccharolyticum</i> *    | 4                  |
| <i>Fervidobacterium pennivorans</i> *             | 1                  | <i>Thermoanaerobacterium thermosulfurigenes</i> * | 4                  |
| <i>Geobacillus kaustophilus</i> *                 | 38                 | <i>Thermococcus barophilus</i> *                  | 1                  |
| <i>Geobacillus thermodenitrificans</i>            | 11                 | <i>Thermococcus cleftensis</i> *                  | 2                  |
| <i>Geoglobus acetivorans</i> *                    | 1                  | <i>Thermococcus fumicolans</i> *                  | 2                  |
| <i>Hydrogenobacter thermophilus</i> *             | 9                  | <i>Thermococcus gammatolerans</i> *               | 1                  |
| <i>Hyperthermus butylicus</i> *                   | 3                  | <i>Thermococcus gorgonarius</i>                   | 1                  |
| <i>Ignicoccus hospitalis</i> *                    | 5                  | <i>Thermococcus hydrothermalis</i>                | 1                  |
| <i>Ignisphaera aggregans</i> *                    | 1                  | <i>Thermococcus kodakarensis</i> *                | 138                |
| <i>Meiothermus ruber</i> *                        | 1                  | <i>Thermococcus litoralis</i> *                   | 19                 |
| <i>Metallosphaera cuprina</i>                     | 1                  | <i>Thermococcus onnurineus</i> *                  | 6                  |
| <i>Metallosphaera prunae</i>                      | 1                  | <i>Thermococcus profundus</i> *                   | 1                  |
| <i>Metallosphaera sedula</i> *                    | 12                 | <i>Thermococcus zilligii</i> *                    | 2                  |
| <i>Methanocaldococcus fervens</i> *               | 1                  | <i>Thermodesulfobacterium geofontis</i> *         | 1                  |
| <i>Methanocaldococcus infernus</i> *              | 2                  | <i>Thermoleophilum album</i>                      | 1                  |
| <i>Methanocaldococcus jannaschii</i>              | 315                | <i>Thermoplasma acidophilum</i>                   | 31                 |
| <i>Methanopyrus kandleri</i>                      | 16                 | <i>Thermoplasma volcanium</i>                     | 13                 |
| <i>Methanothermobacter marburgensis</i>           | 59                 | <i>Thermoproteus tenax</i> *                      | 19                 |
| <i>Methanothermobacter thermautotrophicus</i>     | 117                | <i>Thermosediminibacter oceani</i> *              | 1                  |
| <i>Methanothermococcus thermolithotrophicus</i> * | 6                  | <i>Thermosipho africanus</i>                      | 2                  |
| <i>Methanothermus fervidus</i> *                  | 8                  | <i>Thermosulfidibacter takaii</i> *               | 2                  |
| <i>Methanoterris igneus</i> *                     | 2                  | <i>Thermotoga maritima</i>                        | 260                |
| <i>Nanoarchaeum equitans</i>                      | 3                  | <i>Thermotoga neapolitana</i>                     | 10                 |
| <i>Parageobacillus thermoglucosidasius</i> *      | 1                  | <i>Thermotoga petrophila</i>                      | 2                  |
| <i>Persephonella marina</i> *                     | 2                  | <i>Thermovibrio ammonificans</i> *                | 1                  |
| <i>Picrophilus torridus</i> *                     | 10                 | <i>Thermus aquaticus</i> *                        | 25                 |
| <i>Pyrobaculum aerophilum</i>                     | 21                 | <i>Thermus filiformis</i> *                       | 2                  |
| <i>Pyrobaculum calidifontis</i> *                 | 10                 | <i>Thermus scotoductus</i> *                      | 3                  |
| <i>Pyrobaculum islandicum</i>                     | 3                  | <i>Thermus thermophilus</i>                       | 455                |
| <i>Pyrococcus abyssi</i>                          | 75                 | <i>Ureibacillus thermosphaericus</i> *            | 1                  |
| <i>Pyrococcus furiosus</i>                        | 213                | <i>Vulcanisaeta distributa</i> *                  | 1                  |
| <i>Pyrococcus horikoshii</i>                      | 147                |                                                   |                    |

**Table S3.** List of non-thermophilic species and number of proteins in our full dataset before filtering for sequence length and CD-HIT. Species marked with an asterisk were used for our independent test set.

| Species                                | Number of proteins | Species                                 | Number of proteins |
|----------------------------------------|--------------------|-----------------------------------------|--------------------|
| <i>Acaryochloris marina</i>            | 3                  | <i>Formosa agariphila</i> *             | 36                 |
| <i>Acidithiobacillus ferridurans</i> * | 2                  | <i>Geobacter metallireducens</i>        | 3                  |
| <i>Acidithiobacillus thiooxidans</i> * | 2                  | <i>Geobacter sulfurreducens</i>         | 10                 |
| <i>Actinoplanes missouriensis</i> *    | 3                  | <i>Gillisia limmaea</i> *               | 1                  |
| <i>Aeromonas hydrophila</i>            | 11                 | <i>Gluconacetobacter diazotrophicus</i> | 2                  |
| <i>Agrobacterium fabrum</i>            | 52                 | <i>Gluconobacter oxydans</i>            | 9                  |
| <i>Agrobacterium radiobacter</i>       | 5                  | <i>Gluconobacter thailandicus</i>       | 2                  |
| <i>Agrobacterium tumefaciens</i>       | 5                  | <i>Halalkalibacterium halodurans</i>    | 20                 |
| <i>Albidiferax ferrireducens</i>       | 1                  | <i>Haliscomenobacter hydrossis</i> *    | 1                  |
| <i>Alcanivorax borkumensis</i> *       | 4                  | <i>Halobacillus andaensis</i> *         | 1                  |
| <i>Aliivibrio fischeri</i>             | 10                 | <i>Halomonas halodenitrificans</i> *    | 3                  |
| <i>Aquaspirillum arcticum</i> *        | 1                  | <i>Halothiobacillus neapolitanus</i> *  | 15                 |
| <i>Aquincola tertiarycarbonis</i> *    | 4                  | <i>Hermiimonas arsenicoxydans</i>       | 3                  |
| <i>Aromatoleum aromaticum</i>          | 4                  | <i>Hyphomicrobium methylavorum</i> *    | 3                  |
| <i>Asticcacaulis excentricus</i> *     | 4                  | <i>Hyphomicrobium sulfonivorans</i> *   | 1                  |
| <i>Bacillus atrophaeus</i> *           | 3                  | <i>Ideonella sakaiensis</i> *           | 2                  |
| <i>Bacillus mojavensis</i>             | 3                  | <i>Ilyobacter polytropus</i> *          | 2                  |
| <i>Bacillus subtilis</i>               | 1951               | <i>Lacinutrix mariniflava</i> *         | 1                  |
| <i>Bartonella bacilliformis</i>        | 1                  | <i>Lactococcus lactis</i>               | 75                 |
| <i>Bradyrhizobium diazoefficiens</i>   | 17                 | <i>Leifsonia aquatica</i> *             | 1                  |
| <i>Brevibacillus laterosporus</i>      | 1                  | <i>Leptospira interrogans</i>           | 10                 |
| <i>Carnobacterium maltaromaticum</i> * | 7                  | <i>Leuconostoc mesenteroides</i>        | 15                 |
| <i>Catenulispora acidiphila</i> *      | 2                  | <i>Leucothrix mucor</i>                 | 1                  |
| <i>Cellvibrio japonicus</i>            | 17                 | <i>Lewinella persica</i> *              | 1                  |
| <i>Chitinophaga pinensis</i> *         | 3                  | <i>Lysobacter antibioticus</i> *        | 3                  |
| <i>Chlamydia trachomatis</i>           | 41                 | <i>Marivirga tractuosa</i> *            | 1                  |
| <i>Chondromyces crocatus</i> *         | 2                  | <i>Marteella endophytica</i> *          | 1                  |
| <i>Chromobacterium violaceum</i>       | 10                 | <i>Mesorhizobium japonicum</i> *        | 16                 |
| <i>Clavibacter michiganensis</i>       | 1                  | <i>Methanococcoides burtonii</i> *      | 3                  |
| <i>Clostridium botulinum</i>           | 15                 | <i>Methanococcus vannielii</i>          | 6                  |
| <i>Cowellia psychrerythraea</i>        | 5                  | <i>Methanosphaerula palustris</i> *     | 1                  |
| <i>Corynebacterium ammoniagenes</i> *  | 2                  | <i>Methylorubrum extorquens</i>         | 20                 |
| <i>Cupriavidus metallidurans</i>       | 22                 | <i>Moritella abyssi</i> *               | 2                  |
| <i>Cupriavidus necator</i>             | 40                 | <i>Moritella profunda</i> *             | 1                  |
| <i>Cupriavidus pinatubonensis</i>      | 5                  | <i>Mycoplasma genitalium</i>            | 7                  |
| <i>Cyclobacterium marinum</i> *        | 1                  | <i>Mycoplasmaopsis agalactiae</i>       | 1                  |
| <i>Cytophaga hutchinsonii</i>          | 2                  | <i>Myxococcus fulvus</i> *              | 2                  |
| <i>Dehalococcoides mccartyi</i> *      | 6                  | <i>Myxococcus xanthus</i>               | 45                 |
| <i>Deinococcus radiodurans</i>         | 70                 | <i>Nonlabens dokdonensis</i> *          | 1                  |
| <i>Delftia acidovorans</i>             | 6                  | <i>Nonlabens ulvanivorans</i> *         | 4                  |
| <i>Desulfotalea psychrophila</i> *     | 1                  | <i>Oceanicola granulosis</i> *          | 2                  |
| <i>Escherichia coli</i>                | 259                | <i>Oceanobacillus iheyensis</i>         | 1                  |
| <i>Flavobacterium frigidimaris</i> *   | 1                  | <i>Oenococcus oeni</i>                  | 3                  |
| <i>Flavobacterium johnsoniae</i>       | 6                  | <i>Paenarthrobacter aurescens</i>       | 1                  |
| <i>Flavobacterium psychrophilum</i>    | 1                  | <i>Paenibacillus amylolyticus</i> *     | 1                  |

6 NAR Genomics and Bioinformatics, 2023, Vol. xx, No. xx

**Table S4.** List of non-thermophilic species and number of proteins in our full dataset before filtering for sequence length and CD-HIT. Species marked with an asterisk were used for our independent test set.

| Species                                   | Number of proteins | Species                                   | Number of proteins |
|-------------------------------------------|--------------------|-------------------------------------------|--------------------|
| <i>Paenibacillus lemnae</i> *             | 1                  | <i>Saccharopolyspora erythraea</i>        | 19                 |
| <i>Paenibacillus thiaminolyticus</i> *    | 1                  | <i>Salinispora arenicola</i> *            | 1                  |
| <i>Paludibacter propionigenes</i>         | 1                  | <i>Salinispora tropica</i>                | 4                  |
| <i>Paraburkholderia phytofirmans</i>      | 1                  | <i>Shewanella colwelliana</i>             | 1                  |
| <i>Paraburkholderia xenovorans</i>        | 9                  | <i>Shewanella frigidimarina</i>           | 3                  |
| <i>Paracoccus denitrificans</i>           | 48                 | <i>Shewanella halifaxensis</i>            | 1                  |
| <i>Pectobacterium atrosepticum</i>        | 17                 | <i>Shewanella oneidensis</i> *            | 34                 |
| <i>Pelagibacterium halotolerans</i> *     | 1                  | <i>Shewanella pealeana</i> *              | 1                  |
| <i>Photobacterium phosphoreum</i> *       | 7                  | <i>Shigella flexneri</i>                  | 55                 |
| <i>Photobacterium profundum</i>           | 3                  | <i>Singulisphaera acidiphila</i> *        | 1                  |
| <i>Polaromonas naphthalenivorans</i>      | 1                  | <i>Sinorhizobium medicae</i>              | 2                  |
| <i>Polaromonas sp.</i>                    | 3                  | <i>Sodalis glossinidius</i>               | 1                  |
| <i>Prosthecochloris aestuarii</i>         | 3                  | <i>Sorangium cellulosum</i> *             | 4                  |
| <i>Pseudoalteromonas atlantica</i> *      | 5                  | <i>Sphingosinella xenopeptidolytica</i> * | 1                  |
| <i>Pseudoalteromonas carrageenovora</i> * | 2                  | <i>Staphylococcus xylosus</i> *           | 7                  |
| <i>Pseudoalteromonas haloplanktis</i>     | 4                  | <i>Starkeya novella</i> *                 | 7                  |
| <i>Pseudoalteromonas piscicida</i> *      | 2                  | <i>Stigmatella aurantiaca</i> *           | 7                  |
| <i>Pseudoalteromonas translucida</i>      | 3                  | <i>Streptomyces avermitilis</i>           | 16                 |
| <i>Pseudomonas aeruginosa</i>             | 424                | <i>Streptomyces cyslabdanicus</i> *       | 2                  |
| <i>Pseudomonas entomophila</i>            | 3                  | <i>Streptomyces muensis</i> *             | 1                  |
| <i>Pseudomonas fluorescens</i>            | 37                 | <i>Streptomyces tsukubensis</i> *         | 1                  |
| <i>Pseudomonas marginalis</i> *           | 3                  | <i>Sulfurimonas autotrophica</i> *        | 1                  |
| <i>Pseudoceanicola batsensis</i> *        | 1                  | <i>Sulfurospirillum multivorans</i> *     | 2                  |
| <i>Psychrobacter arcticus</i>             | 3                  | <i>Synechocystis sp.</i>                  | 142                |
| <i>Psychrobacter cryohalolentis</i>       | 2                  | <i>Thalassotalea agarivorans</i>          | 1                  |
| <i>Psychrobacter immobilis</i> *          | 2                  | <i>Thiothrix nivea</i> *                  | 1                  |
| <i>Psychroflexus torquis</i> *            | 1                  | <i>Vibrio campbellii</i>                  | 3                  |
| <i>Psychromonas ingrahamii</i>            | 2                  | <i>Vibrio cholerae</i> serotype           | 147                |
| <i>Renibacterium salmoninarum</i>         | 1                  | <i>Vibrio harveyi</i>                     | 13                 |
| <i>Rhizobium leguminosarum</i>            | 24                 | <i>Vibrio metoecus</i> *                  | 1                  |
| <i>Rhizobium meliloti</i>                 | 54                 | <i>Vibrio parahaemolyticus</i>            | 26                 |
| <i>Rhizobium radiobacter</i>              | 28                 | <i>Vibrio vulnificus</i>                  | 14                 |
| <i>Rhodococcus erythropolis</i>           | 23                 | <i>Xanthomonas axonopodis</i>             | 3                  |
| <i>Rhodopirellula baltica</i>             | 1                  | <i>Xanthomonas campestris</i>             | 40                 |
| <i>Rhodospseudomonas palustris</i>        | 81                 | <i>Xanthomonas citri</i>                  | 3                  |
| <i>Rhodospirillum rubrum</i>              | 27                 | <i>Xylella fastidiosa</i>                 | 9                  |
| <i>Rickettsia prowazekii</i>              | 11                 | <i>Yersinia enterocolitica</i>            | 47                 |
| <i>Roseivirga ehrenbergii</i> *           | 2                  | <i>Yersinia pestis</i>                    | 77                 |
| <i>Roseovarius nubinhibens</i> *          | 3                  | <i>Yersinia pseudotuberculosis</i>        | 25                 |
| <i>Runella zeae</i> *                     | 2                  | <i>Zunongwangia profunda</i> *            | 1                  |
| <i>Saccharibacillus brassicae</i> *       | 1                  | <i>Zymomonas mobilis</i>                  | 19                 |
| <i>Saccharophagus degradans</i>           | 1                  |                                           |                    |

**Table S5.** Hyperparameters and ranges optimized for ProLaTherm: Numbers reflect a list of potential values (curly brackets) or the lower respective upper bound (square brackets), with a step size of 1 for integer values as default. In some cases, specific step sizes  $\Delta$  were used instead of a continuous search space.

| Hyperparameter          | Values                                            | Notes                                                                                            |
|-------------------------|---------------------------------------------------|--------------------------------------------------------------------------------------------------|
| <b>ProLaTherm</b>       |                                                   |                                                                                                  |
| dropout                 | [0,0.5] with $\Delta=0.1$                         | dropout rate for dropout layers                                                                  |
| learning_rate           | { $10^{-5}, 10^{-4}, 10^{-3}, 10^{-2}, 10^{-1}$ } | learning rate of the Adam optimizer                                                              |
| early_stopping_patience | [0,10] with $\Delta=5$                            | epochs without improvement needed for early stopping                                             |
| batch_size              | {64,128,256}                                      | batch size for training                                                                          |
| n_init_units_factor     | [0.5,1] with $\Delta=0.05$                        | number of neurons in the first fully-connected layer in relation to the number of input features |

**Table S6.** Hyperparameters and ranges optimized for the feature-based comparison partners Elastic Net, SVM, Random Forest, XGBoost and MLP: Numbers reflect a list of potential values (curly brackets) or the lower respective upper bound (square brackets), with a step size of 1 for integer values as default. In some cases, specific step sizes  $\Delta$  were used instead of a continuous search space.

| Hyperparameter          | Values                                                                                | Notes                                                                                            |
|-------------------------|---------------------------------------------------------------------------------------|--------------------------------------------------------------------------------------------------|
| <b>Elastic Net</b>      |                                                                                       |                                                                                                  |
| C                       | [ $10^{-3}, 10^3$ ]                                                                   | weighting factor of the regularization terms                                                     |
| l1_ratio                | [0.05,0.95] with $\Delta=0.05$                                                        | trade off between L1- and L2-regularization                                                      |
| <b>SVM</b>              |                                                                                       |                                                                                                  |
| kernel                  | {'linear', 'poly', 'rbf'}                                                             | kernel function to use                                                                           |
| C                       | [ $10^{-3}, 10^3$ ]                                                                   | regularization factor                                                                            |
| degree                  | [1,5]                                                                                 | polynomial degree of kernel function (if kernel is 'poly')                                       |
| gamma                   | [ $10^{-3}, 10^3$ ]                                                                   | kernel coefficient (if kernel is 'rbf' or 'poly')                                                |
| <b>Random Forest</b>    |                                                                                       |                                                                                                  |
| n_estimators            | {50,100,250,500,750,1000,1250,1500,1750,2000,2250,2500,2750,3000,3500,4000,4500,5000} | number of trees in the ensemble                                                                  |
| min_samples_split       | [0.005,0.9] with $\Delta=0.005$                                                       | minimum ratio of the number of samples to split a node                                           |
| max_depth               | [2,50] with $\Delta=2$                                                                | maximum depth of a tree                                                                          |
| min_samples_leaf        | [0.005,0.5] with $\Delta=0.005$                                                       | minimum ratio of the number of samples at a leaf node                                            |
| max_features            | {'sqrt', 'log2'}                                                                      | number of features to consider at determining best split                                         |
| <b>XGBoost</b>          |                                                                                       |                                                                                                  |
| n_estimators            | {50,100,250,500,750,1000,1250,1500,1750,2000,2250,2500,2750,3000}                     | number of trees in the ensemble                                                                  |
| max_depth               | [2,20]                                                                                | maximum depth of a tree                                                                          |
| learning_rate           | [0.025,0.5] with $\Delta=0.025$                                                       | boosting learning rate                                                                           |
| gamma                   | [0,10] with $\Delta=0.1$                                                              | minimum loss reduction for a further partition on a leaf node                                    |
| subsample               | [0.05,0.95] with $\Delta=0.05$                                                        | subsample ratio of training instances for tree construction                                      |
| colsample_bytree        | [0.05,0.95] with $\Delta=0.05$                                                        | ratio of features to use for each tree                                                           |
| reg_alpha               | [0,10] with $\Delta=0.1$                                                              | L1-regularization term on weights                                                                |
| <b>MLP</b>              |                                                                                       |                                                                                                  |
| dropout                 | [0,0.5] with $\Delta=0.1$                                                             | dropout rate for dropout layers                                                                  |
| act_function            | {'relu', 'tanh'}                                                                      | activation function to use                                                                       |
| learning_rate           | { $10^{-5}, 10^{-4}, 10^{-3}, 10^{-2}, 10^{-1}$ }                                     | learning rate of the Adam optimizer                                                              |
| early_stopping_patience | [0,10] with $\Delta=5$                                                                | epochs without improvement needed for early stopping                                             |
| batch_size              | {64,128,256}                                                                          | batch size for training                                                                          |
| n_layers                | [1,5]                                                                                 | number of blocks consisting of a fully-connected, batch normalization and dropout layer          |
| n_init_units_factor     | [0.1,0.95] with $\Delta=0.05$                                                         | number of neurons in the first fully-connected layer in relation to the number of input features |
| perc_dec                | [0.1,0.5] with $\Delta=0.05$                                                          | percentage decrease of number of neurons per building block                                      |

8 NAR Genomics and Bioinformatics, 2023, Vol. xx, No. xx

**Table S7.** Hyperparameters and ranges optimized for the hybrid sequence-based comparison partners LSTM\_BasicDesc and Bi-LSTM\_BasicDesc as well as the purely sequence-based models MLP\_Embedding, LSTM and Bi-LSTM: Numbers reflect a list of potential values (curly brackets) or the lower respective upper bound (square brackets), with a step size of 1 for integer values as default. In some cases, specific step sizes  $\Delta$  were used instead of a continuous search space.

| Hyperparameter           | Values                                                        | Notes                                                                                            |
|--------------------------|---------------------------------------------------------------|--------------------------------------------------------------------------------------------------|
| <b>LSTM_BasicDesc</b>    |                                                               |                                                                                                  |
| dropout                  | [0,0.5] with $\Delta=0.1$                                     | dropout rate for dropout layers                                                                  |
| act_function             | {'relu', 'tanh'}                                              | activation function to use                                                                       |
| learning_rate            | { $10^{-5}$ , $10^{-4}$ , $10^{-3}$ , $10^{-2}$ , $10^{-1}$ } | learning rate of the Adam optimizer                                                              |
| early_stopping_patience  | [0,10] with $\Delta=5$                                        | epochs without improvement needed for early stopping                                             |
| batch_size               | {64,128,256}                                                  | batch size for training                                                                          |
| n_lstm_layers            | [1, 3]                                                        | number of LSTM layers                                                                            |
| hidden_size_exp          | [3, 8]                                                        | dimensionality of hidden states as exponent with base 2                                          |
| n_init_units_factor      | [0.5,1] with $\Delta=0.05$                                    | number of neurons in the first fully-connected layer in relation to the number of input features |
| latent_dim_exp           | [3, 8]                                                        | final dimensionality of latent representation after linear layers                                |
| n_lin_layer              | [0, 3]                                                        | number of linear layers to reach latent_dim_exp, with 0 reflecting no dimensionality increase    |
| <b>Bi-LSTM_BasicDesc</b> |                                                               |                                                                                                  |
| dropout                  | [0,0.5] with $\Delta=0.1$                                     | dropout rate for dropout layers                                                                  |
| act_function             | {'relu', 'tanh'}                                              | activation function to use                                                                       |
| learning_rate            | { $10^{-5}$ , $10^{-4}$ , $10^{-3}$ , $10^{-2}$ , $10^{-1}$ } | learning rate of the Adam optimizer                                                              |
| early_stopping_patience  | [0,10] with $\Delta=5$                                        | epochs without improvement needed for early stopping                                             |
| batch_size               | {64,128,256}                                                  | batch size for training                                                                          |
| n_lstm_layers            | [1, 3]                                                        | number of LSTM layers                                                                            |
| hidden_size_exp          | [3, 8]                                                        | dimensionality of hidden states as exponent with base 2                                          |
| n_init_units_factor      | [0.5,1] with $\Delta=0.05$                                    | number of neurons in the first fully-connected layer in relation to the number of input features |
| latent_dim_exp           | [3, 8]                                                        | final dimensionality of latent representation after linear layers                                |
| n_lin_layer              | [0, 3]                                                        | number of linear layers to reach latent_dim_exp, with 0 reflecting no dimensionality increase    |
| <b>MLP_Embedding</b>     |                                                               |                                                                                                  |
| dropout                  | [0,0.5] with $\Delta=0.1$                                     | dropout rate for dropout layers                                                                  |
| act_function             | {'relu', 'tanh'}                                              | activation function to use                                                                       |
| learning_rate            | { $10^{-5}$ , $10^{-4}$ , $10^{-3}$ , $10^{-2}$ , $10^{-1}$ } | learning rate of the Adam optimizer                                                              |
| early_stopping_patience  | [0,10] with $\Delta=5$                                        | epochs without improvement needed for early stopping                                             |
| batch_size               | {64,128,256}                                                  | batch size for training                                                                          |
| two_layer_head_class     | {False, True}                                                 | use first fully-connected layer of head classifier architecture                                  |
| n_init_units_factor      | [0.5,1] with $\Delta=0.05$                                    | number of neurons in the first fully-connected layer in relation to the number of input features |
| embedding_dim            | 1024                                                          | dimensionality of embedding layer, here set to 1024                                              |
| <b>LSTM</b>              |                                                               |                                                                                                  |
| dropout                  | [0,0.5] with $\Delta=0.1$                                     | dropout rate for dropout layers                                                                  |
| act_function             | {'relu', 'tanh'}                                              | activation function to use                                                                       |
| learning_rate            | { $10^{-5}$ , $10^{-4}$ , $10^{-3}$ , $10^{-2}$ , $10^{-1}$ } | learning rate of the Adam optimizer                                                              |
| early_stopping_patience  | [0,10] with $\Delta=5$                                        | epochs without improvement needed for early stopping                                             |
| batch_size               | {64,128,256}                                                  | batch size for training                                                                          |
| n_lstm_layers            | [1, 3]                                                        | number of LSTM layers                                                                            |
| hidden_size_exp          | [3, 8]                                                        | dimensionality of hidden states as exponent with base 2                                          |
| n_init_units_factor      | [0.5,1] with $\Delta=0.05$                                    | number of neurons in the first fully-connected layer in relation to the number of input features |
| embedding_dim            | 1024                                                          | dimensionality of embedding layer, here set to 1024                                              |
| <b>Bi-LSTM</b>           |                                                               |                                                                                                  |
| dropout                  | [0,0.5] with $\Delta=0.1$                                     | dropout rate for dropout layers                                                                  |
| act_function             | {'relu', 'tanh'}                                              | activation function to use                                                                       |
| learning_rate            | { $10^{-5}$ , $10^{-4}$ , $10^{-3}$ , $10^{-2}$ , $10^{-1}$ } | learning rate of the Adam optimizer                                                              |
| early_stopping_patience  | [0,10] with $\Delta=5$                                        | epochs without improvement needed for early stopping                                             |
| batch_size               | {64,128,256}                                                  | batch size for training                                                                          |
| n_lstm_layers            | [1, 3]                                                        | number of LSTM layers                                                                            |
| hidden_size_exp          | [3, 8]                                                        | dimensionality of hidden states as exponent with base 2                                          |
| n_init_units_factor      | [0.5,1] with $\Delta=0.05$                                    | number of neurons in the first fully-connected layer in relation to the number of input features |
| embedding_dim_exp        | [4, 8]                                                        | dimensionality of embedding layer as exponent with base 2                                        |



**Table S8.** Hyperparameters and ranges optimized for the purely sequence-based comparison partners vanilla-Transformer and BigBird: Numbers reflect a list of potential values (curly brackets) or the lower respective upper bound (square brackets), with a step size of 1 for integer values as default. In some cases, specific step sizes  $\Delta$  were used instead of a continuous search space.

| Hyperparameter             | Values                                   | Notes                                                                                                    |
|----------------------------|------------------------------------------|----------------------------------------------------------------------------------------------------------|
| <b>vanilla-Transformer</b> |                                          |                                                                                                          |
| dropout                    | [0.1,0.5] with $\Delta = 0.1$            | dropout rate for dropout layers                                                                          |
| learning_rate              | { $10^{-5}, 10^{-4}, 10^{-3}$ }          | learning rate of the Adam optimizer                                                                      |
| early_stopping_patience    | 50                                       | epochs without improvement needed for early stopping, set to 50                                          |
| n_minibatches              | {2, 4, 8}                                | number of minibatches with similar sequence length within each batch of size 1024                        |
| embedding_dim_exp          | [4, 6]                                   | dimensionality of embeddings as exponent with base 2                                                     |
| kernel_size_avgpool        | 2, 3, 5                                  | kernel size of average pooling layer                                                                     |
| n_heads                    | [2,6] with $\Delta = 2$                  | number of heads in each Transformer layer                                                                |
| n_transformer_blocks       | [2,6] with $\Delta = 2$                  | number of Transformer layers                                                                             |
| factor_hidden_dim_mlp      | [2, 4]                                   | factor of number of neurons in feedforward part of Transformer block in relation to input dimensionality |
| two_layer_head_class       | {False, True}                            | use first fully-connected layer of head classifier architecture                                          |
| label_smoothing            | {0.0, 0.1}                               | label smoothing used for loss calculation                                                                |
| weight_decay               | { $10^{-4}, 10^{-3}, 10^{-2}, 10^{-1}$ } | weight decay for Adam optimizer                                                                          |
| <b>BigBird</b>             |                                          |                                                                                                          |
| dropout                    | [0.1,0.5] with $\Delta = 0.1$            | dropout rate for dropout layers                                                                          |
| learning_rate              | { $10^{-5}, 10^{-4}, 10^{-3}$ }          | learning rate of the Adam optimizer                                                                      |
| early_stopping_patience    | 50                                       | epochs without improvement needed for early stopping, set to 50                                          |
| n_minibatches              | {4, 8}                                   | number of minibatches with similar sequence length within each batch of size 1024                        |
| embedding_dim_exp          | [4, 6]                                   | dimensionality of embeddings as exponent with base 2                                                     |
| n_heads                    | [2,6] with $\Delta = 2$                  | number of heads in each Transformer layer                                                                |
| n_transformer_blocks       | [2,6] with $\Delta = 2$                  | number of Transformer layers                                                                             |
| fact_num_global_tokens     | {2,3}                                    | factor of number of global tokens in relation to block size                                              |
| block_size                 | {8,16,32}                                | size of each block for sparse self-attention                                                             |
| two_layer_head_class       | {False, True}                            | use first fully-connected layer of head classifier architecture                                          |
| label_smoothing            | {0.0, 0.1}                               | label smoothing used for loss calculation                                                                |
| weight_decay               | { $10^{-4}, 10^{-3}, 10^{-2}, 10^{-1}$ } | weight decay for Adam optimizer                                                                          |

10 NAR Genomics and Bioinformatics, 2023, Vol. xx, No. xx

**Table S9.** Overview of the test and validation results with no overlap between the species in the test and cross-validation data: For each prediction model, we show the given evaluation metric on the full test set (*test set 1*) in the first line as well as the mean and standard deviation on the validation sets of the five-fold cross-validation in the second line. The prediction models are grouped as feature-based as well as hybrid and purely sequence-based. With respect to the comparison partners from the literature, we only report the evaluation metrics on the test data as these models were cross-validated using another data split with a potential overlap between the authors’ training data and our validation sets. Due to the composition of our test data, we ensure a fair comparison, see Experimental Settings. The best result for each evaluation metric is highlighted in bold - both for the test and validation data. Results for *test set 2* consisting of evolutionary less related proteins can be found in Table 4 of the main paper.

| Prediction model                           | Accuracy                             | F1-Score                             | Precision                            | Recall                        | Specificity                          | BACC                                 | MCC                                  |
|--------------------------------------------|--------------------------------------|--------------------------------------|--------------------------------------|-------------------------------|--------------------------------------|--------------------------------------|--------------------------------------|
| <b>Feature-based models</b>                |                                      |                                      |                                      |                               |                                      |                                      |                                      |
| Elastic Net                                | 0.814<br>(0.911±0.009)               | 0.822<br>(0.855±0.015)               | 0.976<br>(0.893±0.015)               | 0.710<br>(0.821±0.025)        | 0.973<br>(0.954±0.007)               | 0.842<br>(0.887±0.013)               | 0.672<br>(0.793±0.021)               |
| SVM                                        | 0.817<br>(0.911±0.009)               | 0.827<br>(0.858±0.015)               | 0.969<br>(0.879±0.015)               | 0.722<br>(0.838±0.019)        | 0.964<br>(0.946±0.007)               | 0.843<br>(0.892±0.012)               | 0.673<br>(0.794±0.022)               |
| Random Forest                              | 0.712<br>(0.872±0.008)               | 0.695<br>(0.771±0.017)               | 0.969<br>(0.904±0.016)               | 0.542<br>(0.673±0.025)        | 0.973<br>(0.966±0.006)               | 0.758<br>(0.820±0.012)               | 0.532<br>(0.700±0.019)               |
| XGBoost                                    | 0.840<br>(0.921±0.008)               | 0.852<br>(0.872±0.014)               | 0.974<br>(0.905±0.014)               | 0.757<br>(0.843±0.024)        | 0.969<br>(0.958±0.007)               | 0.863<br>(0.900±0.011)               | 0.710<br>(0.817±0.019)               |
| MLP                                        | 0.844<br>(0.915±0.008)               | 0.856<br>(0.863±0.014)               | 0.971<br>(0.890±0.005)               | 0.765<br>(0.839±0.025)        | 0.964<br>(0.951±0.003)               | 0.865<br>(0.895±0.012)               | 0.714<br>(0.803±0.019)               |
| <b>Hybrid sequence-based models</b>        |                                      |                                      |                                      |                               |                                      |                                      |                                      |
| LSTM_BasicDesc                             | 0.837<br>(0.903±0.008)               | 0.854<br>(0.842±0.015)               | 0.934<br>(0.877±0.011)               | 0.786<br>(0.811±0.032)        | 0.915<br>(0.946±0.007)               | 0.850<br>(0.878±0.014)               | 0.685<br>(0.774±0.019)               |
| Bi-LSTM_BasicDesc                          | 0.779<br>(0.908±0.014)               | 0.781<br>(0.855±0.019)               | 0.974<br>(0.869±0.042)               | 0.652<br>(0.842±0.009)        | 0.973<br>(0.939±0.023)               | 0.813<br>(0.891±0.010)               | 0.622<br>(0.788±0.031)               |
| <b>Purely sequence-based models</b>        |                                      |                                      |                                      |                               |                                      |                                      |                                      |
| MLP_Embedding                              | 0.819<br>(0.892±0.016)               | 0.827<br>(0.829±0.017)               | 0.984<br>(0.855±0.060)               | 0.713<br>(0.811±0.040)        | 0.982<br>(0.931±0.039)               | 0.848<br>(0.871±0.009)               | 0.684<br>(0.754±0.029)               |
| LSTM                                       | 0.837<br>(0.901±0.008)               | 0.851<br>(0.842±0.013)               | 0.953<br>(0.868±0.028)               | 0.768<br>(0.819±0.025)        | 0.942<br>(0.940±0.016)               | 0.855<br>(0.880±0.010)               | 0.694<br>(0.772±0.019)               |
| Bi-LSTM                                    | 0.807<br>(0.909±0.006)               | 0.818<br>(0.853±0.009)               | 0.950<br>(0.888±0.033)               | 0.719<br>(0.823±0.032)        | 0.942<br>(0.950±0.017)               | 0.830<br>(0.886±0.009)               | 0.648<br>(0.790±0.012)               |
| vanilla-Transformer                        | 0.803<br>(0.898±0.007)               | 0.812<br>(0.833±0.012)               | 0.964<br>(0.880±0.022)               | 0.701<br>(0.791±0.019)        | 0.960<br>(0.948±0.011)               | 0.831<br>(0.870±0.009)               | 0.651<br>(0.762±0.018)               |
| BigBird                                    | 0.814<br>(0.894±0.009)               | 0.821<br>(0.825±0.016)               | 0.984<br>(0.880±0.016)               | 0.704<br>(0.776±0.021)        | 0.982<br>(0.950±0.007)               | 0.843<br>(0.863±0.012)               | 0.677<br>(0.752±0.022)               |
| ProLaTherm                                 | <b>0.919</b><br><b>(0.978±0.005)</b> | <b>0.929</b><br><b>(0.966±0.009)</b> | <b>0.997</b><br><b>(0.980±0.005)</b> | 0.870<br><b>(0.952±0.015)</b> | <b>0.996</b><br><b>(0.991±0.002)</b> | <b>0.933</b><br><b>(0.971±0.008)</b> | <b>0.847</b><br><b>(0.950±0.012)</b> |
| <b>Comparison partners from literature</b> |                                      |                                      |                                      |                               |                                      |                                      |                                      |
| ThermoPred (5)                             | 0.817                                | 0.840                                | 0.895                                | 0.791                         | 0.857                                | 0.824                                | 0.635                                |
| SCMTPP (6)                                 | 0.807                                | 0.821                                | 0.937                                | 0.730                         | 0.924                                | 0.827                                | 0.641                                |
| iThermo (7)                                | 0.819                                | 0.842                                | 0.893                                | 0.797                         | 0.853                                | 0.825                                | 0.637                                |
| SAPPHIRE (8)                               | 0.870                                | 0.884                                | 0.966                                | 0.814                         | 0.955                                | 0.885                                | 0.752                                |
| DeepTP* (9)                                | 0.888                                | 0.903                                | 0.925                                | <b>0.882</b>                  | 0.897                                | 0.889                                | 0.772                                |
| BertThermo (10)                            | 0.880                                | 0.898                                | 0.931                                | 0.867                         | 0.902                                | 0.884                                | 0.757                                |

\* 25 proteins excluded from evaluation metric calculation due to overlap with the comparison partner’s training data

**Table S10.** Mean BLAST identity of thermophilic species from *test set 1*: The total number of proteins per thermophilic organism used in *test set 1* is given, as well as the number of correctly classified proteins. For each species we show the average BLAST sequence identity of the best hit among the thermophilic and non-thermophilic training data.

| Species                                         | # proteins | # true positives | BLAST identity thermo. | BLAST identity non-thermo. |
|-------------------------------------------------|------------|------------------|------------------------|----------------------------|
| <i>Acidianus ambivalens</i>                     | 10         | 8                | 0.190                  | 0.114                      |
| <i>Aciduliprofundum boonei</i>                  | 1          | 1                | 0.568                  | 0.559                      |
| <i>Aquifex pyrophilus</i>                       | 3          | 3                | 0.348                  | 0.352                      |
| <i>Archaeoglobus profundus</i>                  | 8          | 8                | 0.480                  | 0.147                      |
| <i>Caldalkalibacillus thermarum</i>             | 1          | 0                | 0.265                  | 0.235                      |
| <i>Caldicellulosiruptor saccharolyticus</i>     | 1          | 1                | 0.047                  | 0.447                      |
| <i>Deferribacter desulfuricans</i>              | 1          | 1                | 0.385                  | 0.424                      |
| <i>Fervidobacterium pennivorans</i>             | 1          | 1                | 0.020                  | 0.143                      |
| <i>Geobacillus kaustophilus</i>                 | 37         | 11               | 0.313                  | 0.499                      |
| <i>Geoglobus acetivorans</i>                    | 1          | 1                | 0.404                  | 0.323                      |
| <i>Hydrogenobacter thermophilus</i>             | 9          | 8                | 0.231                  | 0.239                      |
| <i>Hyperthermus butylicus</i>                   | 3          | 3                | 0.538                  | 0.222                      |
| <i>Ignicoccus hospitalis</i>                    | 5          | 4                | 0.493                  | 0.176                      |
| <i>Ignisphaera aggregans</i>                    | 1          | 1                | 0.540                  | 0.540                      |
| <i>Meiothermus ruber</i>                        | 1          | 0                | 0.041                  | 0.461                      |
| <i>Metallosphaera sedula</i>                    | 10         | 10               | 0.490                  | 0.288                      |
| <i>Methanocaldococcus fervens</i>               | 1          | 1                | 0.196                  | 0.034                      |
| <i>Methanocaldococcus infernus</i>              | 2          | 2                | 0.063                  | 0.094                      |
| <i>Methanothermococcus thermolithotrophicus</i> | 5          | 5                | 0.516                  | 0.275                      |
| <i>Methanothermus fervidus</i>                  | 6          | 6                | 0.425                  | 0.180                      |
| <i>Methanoterris igneus</i>                     | 2          | 2                | 0.542                  | 0.073                      |
| <i>Parageobacillus thermoglucosidasius</i>      | 1          | 1                | 0.146                  | 0.600                      |
| <i>Persephonella marina</i>                     | 2          | 2                | 0.195                  | 0.059                      |
| <i>Picrophilus torridus</i>                     | 10         | 6                | 0.322                  | 0.187                      |
| <i>Pyrobaculum calidifontis</i>                 | 10         | 10               | 0.271                  | 0.205                      |
| <i>Rhodothermus marinus</i>                     | 8          | 6                | 0.163                  | 0.179                      |
| <i>Spirochaeta thermophila</i>                  | 2          | 1                | 0.126                  | 0.189                      |
| <i>Sulfophobococcus zilligii</i>                | 1          | 1                | 0.619                  | 0.088                      |
| <i>Thermoanaerobacter ethanolicus</i>           | 1          | 1                | 0.301                  | 0.286                      |
| <i>Thermoanaerobacter italicus</i>              | 1          | 1                | 0.267                  | 0.534                      |
| <i>Thermoanaerobacterium saccharolyticum</i>    | 3          | 2                | 0.334                  | 0.222                      |
| <i>Thermoanaerobacterium thermosulfurigenes</i> | 3          | 2                | 0.297                  | 0.099                      |
| <i>Thermococcus barophilus</i>                  | 1          | 1                | 0.299                  | 0.304                      |
| <i>Thermococcus cleftensis</i>                  | 2          | 2                | 0.210                  | 0.132                      |
| <i>Thermococcus fumicolans</i>                  | 1          | 1                | 0.776                  | 0.115                      |
| <i>Thermococcus gammatolerans</i>               | 1          | 1                | 0.831                  | 0.153                      |
| <i>Thermococcus kodakarensis</i>                | 118        | 118              | 0.582                  | 0.196                      |
| <i>Thermococcus litoralis</i>                   | 16         | 16               | 0.519                  | 0.244                      |
| <i>Thermococcus onnurineus</i>                  | 5          | 5                | 0.489                  | 0.119                      |
| <i>Thermococcus profundus</i>                   | 1          | 1                | 0.847                  | 0.525                      |
| <i>Thermococcus zilligii</i>                    | 1          | 1                | 0.534                  | 0.065                      |
| <i>Thermodesulfobacterium geofontis</i>         | 1          | 1                | 0.099                  | 0.291                      |
| <i>Thermoproteus tenax</i>                      | 18         | 18               | 0.280                  | 0.158                      |
| <i>Thermosediminibacter oceani</i>              | 1          | 1                | 0.050                  | 0.624                      |
| <i>Thermosulfidibacter takaii</i>               | 2          | 2                | 0.275                  | 0.355                      |
| <i>Thermovibrio ammonificans</i>                | 1          | 1                | 0.042                  | 0.050                      |
| <i>Thermus aquaticus</i>                        | 19         | 16               | 0.601                  | 0.329                      |
| <i>Thermus filiformis</i>                       | 1          | 1                | 0.891                  | 0.028                      |
| <i>Thermus scotoductus</i>                      | 3          | 3                | 0.394                  | 0.174                      |
| <i>Ureibacillus thermosphaericus</i>            | 1          | 0                | 0.647                  | 0.052                      |
| <i>Vulcanisaeta distributa</i>                  | 1          | 1                | 0.303                  | 0.087                      |

## REFERENCES

1. Prabhakaran, M. (1990) The distribution of physical, chemical and conformational properties in signal and nascent peptides. *The Biochemical journal*, **269**(3), 691–696.
2. Tomii, K. and Kanehisa, M. (1996) Analysis of amino acid indices and mutation matrices for sequence comparison and structure prediction of proteins. *Protein engineering*, **9**(1), 27–36.
3. Dubchak, I., Muchnik, I., Mayor, C., Dralyuk, I., and Kim, S.-H. (1999) Recognition of a protein fold in the context of the SCOP classification. *Proteins: Structure, Function, and Bioinformatics*, **35**(4), 401–407.
4. Chou, K. C. (2001) Prediction of protein cellular attributes using pseudo-amino acid composition. *Proteins*, **43**(3), 246–255.
5. Lin, H. and Chen, W. (2011) Prediction of thermophilic proteins using feature selection technique. *Journal of microbiological methods*, **84**(1), 67–70.
6. Charoenkwan, P., Chotpatiwetchkul, W., Lee, V. S., Nantasenamat, C., and Shoombuatong, W. (2021) A novel sequence-based predictor for identifying and characterizing thermophilic proteins using estimated propensity scores of dipeptides. *Scientific reports*, **11**(1), 23782.
7. Ahmed, Z., Zulfiqar, H., Khan, A. A., Gul, I., Dao, F.-Y., Zhang, Z.-Y., Yu, X.-L., and Tang, L. (2022) iThermo: A Sequence-Based Model for Identifying Thermophilic Proteins Using a Multi-Feature Fusion Strategy. *Frontiers in microbiology*, **13**, 790063.
8. Charoenkwan, P., Schaduangrat, N., Moni, M. A., Lio', P., Manavalan, B., and Shoombuatong, W. (2022) SAPPHERE: A stacking-based ensemble learning framework for accurate prediction of thermophilic proteins. *Computers in biology and medicine*, **146**, 105704.
9. Zhao, J., Yan, W., and Yang, Y. (2023) DeepTP: A Deep Learning Model for Thermophilic Protein Prediction. *International Journal of Molecular Sciences*, **24**(3).
10. Pei, H., Li, J., Ma, S., Jiang, J., Li, M., Zou, Q., and Lv, Z. (2023) Identification of Thermophilic Proteins Based on Sequence-Based Bidirectional Representations from Transformer-Embedding Features. *Applied Sciences*, **13**(5).
